# Supplementary material
Source: PubMed Central journal article supplement (PMC6054501)
Supplement: DC180240SupplementaryData.pdf [file DC180240SupplementaryData.pdf]

SUPPLEMENTARY DATA

**Supplementary Figure 1.** Flow of participant recruitment in the D2d study

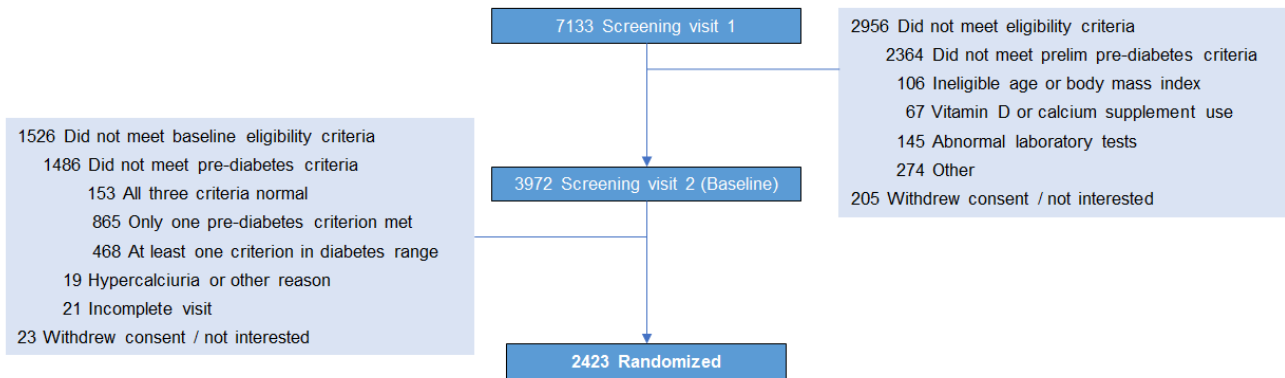

**Supplementary Figure 2.** Sub-groups (dark sections) by glycemic categories in the D2d study

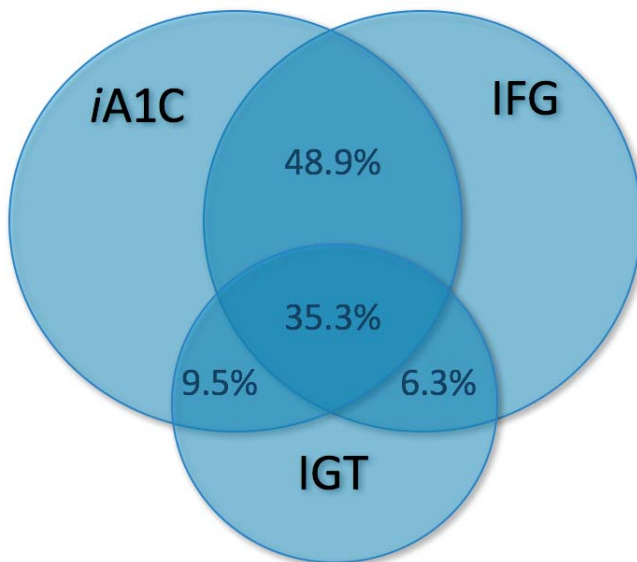

Percentages refer to the D2d cohort (2,423 participants). *iA1c*, impaired Hemoglobin A1c (HbA1c 5.7 to 6.4% [39 to 46 mmol/mol]); IFG, impaired fasting glucose (fasting plasma glucose 100 to 125 mg/dL); IGT, impaired glucose tolerance (2-hour post load glucose 140 to 199 mg/dL).

## SUPPLEMENTARY DATA

### **D2d Research Group Collaborators**

#### *Steering Committee*

- Anastassios G. Pittas, MD MS (Tufts Medical Center, Boston, MA, *Chair*)
- Vanita Aroda, MD (MedStar Health Research Institute, Hyattsville, MD)
- Irwin Brodsky, MD (Maine Medical Center Research Institute, Scarborough, ME)
- Lisa Ceglia, MD MS (Tufts Medical Center, Boston, MA)
- Chhavi Chadha, MD (HealthPartners Research Foundation, Minneapolis, MN)
- Raneer Chatterjee, MD and Rowena Dolor, MD MHS (Duke University Medical Center, Durham, NC)
- Bess Dawson-Hughes, MD (Tufts University, Boston, MA)
- Cyrus Desouza, MBBS (University of Nebraska Medical Center and Omaha VA Medical Center, Omaha, NE)
- John Foreyt, PhD (Baylor College of Medicine, Houston, TX)
- Adline Ghazi, MD (MedStar Good Samaritan Hospital, Baltimore, MD)
- Daniel Hsia, MD (Pennington Biomedical Research Center, Baton Rouge, LA)
- Karen C. Johnson, MD, MPH (University of Tennessee Health Science Center, Memphis, TN)
- Sangeeta Kashyap, MD (Cleveland Clinic, Cleveland, OH)
- Sun Kim, MD (Stanford University Medical Center, Palo Alto, CA)
- Erin S. LeBlanc, MD (Kaiser Permanente NW, Portland, OR)
- Michael R. Lewis, MD MBA (University of Vermont – Central Laboratory, Burlington, VT)
- Emilia Liao, MD (Northwell Health, New York, NY)
- Saul Malozowski, MD, PhD (National Institute of Diabetes and Digestive and Kidney Diseases, Bethesda, MD)
- Lisa M. Neff, MD MS (Northwestern University, Chicago, IL)
- Patrick O'Neil, PhD (Medical University of South Carolina, Charleston, SC)
- Jean Park, MD (MedStar Health Research Institute, Hyattsville, MD)
- Anne Peters, MD (USC Keck School of Medicine, Los Angeles, CA)
- Lawrence Phillips, MD (Emory University School of Medicine, Atlanta, GA and Atlanta VA Medical Center, Decatur, GA)
- Richard Pratley, MD (Florida Hospital Translational Research Institute, Orlando, FL)
- Philip Raskin, MD (University of Texas Southwestern Medical Center, Dallas, TX)
- Neda Rasouli, MD (University of Colorado Denver and VA Eastern Colorado Health Care System, Denver, CO)
- David Robbins, MD (University of Kansas Medical Center, Kansas City, KS)
- Clifford Rosen, MD (Maine Medical Center Research Institute, Scarborough, Maine)
- Patricia Sheehan, RN MPH MS, (Tufts Medical Center, Boston, MA)
- Myrlene Staten, MD (Kelly Government Solutions for the National Institute of Diabetes and Digestive and Kidney Diseases, Bethesda, MD)

#### *Advisor*

- William Knowler, MD DrPH (National Institute of Diabetes and Digestive and Kidney Diseases, Phoenix, AZ)

#### *Executive Committee:*

- Anastassios G. Pittas, MD MS, *Chair*
- Bess Dawson-Hughes, MD
- Saul Malozowski, MD, PhD
- David Reboussin, PhD
- David Robbins, MD
- Clifford Rosen, MD
- Patricia Sheehan, RN MPH MS

## SUPPLEMENTARY DATA

- Myrlene Staten, MD  
*Coordinating Center (Tufts Medical Center):*
- Anastassios Pittas, MD MS, *Director*
- Patricia Sheehan, RN MPH MS, *Project Manager*
- Paul Fuss
- Cindy Haviet, MS
- Olivia Lovegreen
- Jason Nelson, MPH
- Danielle Riggs
- Ellen Vickery, MS  
*Past Coordinating Center members:*
- Eliza Barrett
- Erica Caravana
- James Ware, PhD  
*NIDDK Staff:*
- Saul Malozowski, MD, PhD
- Myrlene Staten, MD  
*Data Safety and Monitoring Board:*
- Jill Crandall, MD, *Chair*
- Ronald Ackermann, MD, MPH, FACP
- John Adams, MD
- Jim Neaton, PhD
- Anne Stoddard, ScD  
*Central Laboratory:*
- Michael Lewis, MD, *Director*
- Rebekah Boyle
- Elaine Cornell
- Lyndelle LeBruin, MS, MPH
